# Supplementary material for: Effectiveness of a Blended Multidisciplinary Intervention for Patients with Moderate Medically Unexplained Physical Symptoms (PARASOL): Protocol for a Cluster Randomized Clinical Trial
Source: PubMed Central journal article supplement (PMC5964304; doi:10.2196/resprot.9404), 2018-05-08
Supplement: resprot_v7i5e120_app1.pdf [file resprot_v7i5e120_app1.pdf]

## Schematic view of the blended health care program

|         |                     |                                                                                                                                                                                                             |
|---------|---------------------|-------------------------------------------------------------------------------------------------------------------------------------------------------------------------------------------------------------|
| Intake  | Physical therapist  | Anamnesis and physical examination<br>Providing information about the web-based part of the health care program                                                                                             |
| Week 1  | Mental health nurse | Anamnesis according to the SCEGS                                                                                                                                                                            |
|         | Physical therapist  | Education about therapeutic neuroscience education<br>Providing information about the 3-day baseline self-test                                                                                              |
| Week 2  | Mental health nurse | Education about perpetuating factors                                                                                                                                                                        |
|         | Web-based component | Module 1: Central sensitization & perpetuating factors<br>Performance of a 3-day baseline test                                                                                                              |
| Week 2  | Web-based component | Module 2: Graded activity & Behavioral change                                                                                                                                                               |
| Week 3  | Physical therapist  | Evaluation of education week 1<br>Education about graded activity<br>Evaluation results from the 3-day self-test<br>Determining short term goal<br>Discussing the gradual increase of the selected activity |
|         | Mental health nurse | Patient specific inventory on perpetuating factors<br>Education about coping strategies<br>Starting gradually increase selected activity                                                                    |
| Week 4  | Web-based component | Module 4: Stress                                                                                                                                                                                            |
| Week 5  | Web-based component | Module 5: Coping with physical complaints                                                                                                                                                                   |
| Week 6  | Physical therapist  | Evaluation of graded activity<br>Evaluation of online modules<br>Coaching on lifestyle                                                                                                                      |
|         | Mental health nurse | Evaluation of perpetuating factors<br>Evaluation of the coping strategies                                                                                                                                   |
| Week 7  | Web-based component | Module 7: Relaxation                                                                                                                                                                                        |
| Week 8  | Web-based component | Module 8: Lifestyle                                                                                                                                                                                         |
| Week 9  | Web-based component | Module 9: Creating an exercise plan                                                                                                                                                                         |
| Week 10 | Web-based component | Module 10: Performing the exercise plan                                                                                                                                                                     |
| Week 11 | Web-based component | Module 11: Maintaining an active lifestyle and avoiding a relapse                                                                                                                                           |
| Week 12 | Physical therapist  | Discussing long-term goals<br>Support to maintain a physically active lifestyle                                                                                                                             |
